# Supplementary material for: Sustainable methods for the carboxymethylation and methylation of ursolic acid with dimethyl carbonate under mild and acidic conditions
Source: Royal Society of Chemistry journal article supplement (doi:10.1039/d4ra02122c), 2024-01-01
Supplement: d4ra02122c1.pdf [file d4ra02122c1.pdf]

**Electronic Supplementary Information (ESI) for:**

**Sustainable methods for the carboxymethylation and methylation of ursolic acid with  
dimethyl carbonate under mild and acidic conditions**

*Nuttapong Kadsanit,<sup>a</sup> Pattamabhorn Worsawat,<sup>a</sup> Chadamas Sakonsinsiri,<sup>b</sup> Con R. McElroy,<sup>c,d</sup>  
Duncan Macquarrie,<sup>d</sup> Pakin Noppawan,<sup>e</sup> and Andrew J. Hunt<sup>a\*</sup>*

<sup>a</sup> Materials Chemistry Research Center (MCRC), Department of Chemistry and Centre of Excellence for Innovation in Chemistry, Faculty of Science, Khon Kaen University, Khon Kaen, 40002, Thailand. \*Corresponding author: andrew@kku.ac.th

<sup>b</sup> Department of Biochemistry, Faculty of Medicine, Khon Kaen University, Khon Kaen, 40002, Thailand.

<sup>c</sup> School of Chemistry, University of Lincoln, Brayford Pool Campus, Lincoln, LN6 7TS, UK.

<sup>d</sup> Green chemistry Centre of Excellence, Department of Chemistry, University of York, Heslington, York, YO10 5DD, UK.

<sup>e</sup> Department of Chemistry, Faculty of Science, Mahasarakham University, Maha Sarakham, 44150, Thailand.

## Content

|          |                                                                                                                                                               |
|----------|---------------------------------------------------------------------------------------------------------------------------------------------------------------|
| Page S3  | 1. Experimental section                                                                                                                                       |
|          | 2. Characterisation of structures of products                                                                                                                 |
|          | Figure S1. <sup>1</sup> HNMR of cyclohexanol in CDCl <sub>3</sub>                                                                                             |
| Page S4  | Figure S2. <sup>1</sup> HNMR of ursolic acid in CDCl <sub>3</sub>                                                                                             |
| Page S5  | Figure S3. <sup>1</sup> HNMR of 3β-[[methoxy]carbonyl]oxyurs-12-en-28-oic acid in CDCl <sub>3</sub>                                                           |
| Page S6  | Figure S4. <sup>1</sup> HNMR of 3β-methoxyurs-12-en-28-oic acid in CDCl <sub>3</sub>                                                                          |
| Page S7  | Figure S5. <sup>1</sup> HNMR of 3β-formylurs-12-en-28-oic acid in CDCl <sub>3</sub>                                                                           |
| Page S8  | Figure S6. <sup>1</sup> HNMR of urs-2,12-dien-28-oic acid in CDCl <sub>3</sub>                                                                                |
| Page S9  | Figure S7. <sup>13</sup> CNMR of urs-2,12-dien-28-oic acid in CDCl <sub>3</sub>                                                                               |
| Page S10 | Table S1 the conversion and selectivity of carboxymethylation and/or methylation reactions with cyclohexanol and acids.                                       |
| Page S11 | Table S2 the yield and the conversion of ursolic acid ester synthesized from ursolic acid, acid catalysts, and DMC in various conditions.                     |
| Page S12 | Table S3 the yield and the conversion of ursolic acid ester synthesized from ursolic acid, formic acid, and DMC in various conditions.                        |
| Page S13 | Figure S8. Possible mechanism for carboxymethylation reaction of PTSA and side reaction of high amount of PTSA.                                               |
|          | Figure S9. Possible dehydration mechanism of ursolic acid with DMC and PTSA.                                                                                  |
| Page S14 | Figure S10. Possible esterification mechanism of ursolic acid with formic acid.                                                                               |
|          | Figure S11. Possible Carboxymethylation mechanism of ursolic acid with DMC and H <sub>2</sub> SO <sub>4</sub> -SiO <sub>2</sub> .                             |
| Page S15 | Green metrics calculations                                                                                                                                    |
| Page S21 | Carboxymethylation, methylation and formylation of Menthol                                                                                                    |
| Page S21 | Carboxymethylation, methylation and formylation of Corosolic acid                                                                                             |
| Page S24 | Table S9 Physicochemical parameters and Lipinski's rule of five of ursolic acid, corosolic acid and their derivatives using the SwissADME predictive database |
| Page S25 | Table S10 Result of absorption properties of ursolic acid, corosolic acid and their derivatives by pkCSM                                                      |
| Page S26 | Table S11 Result of distribution and metabolism properties of ursolic acid, corosolic acid and their derivatives by pkCSM                                     |
| Page S27 | Table S12 Result of excretion and toxicity properties of ursolic acid, corosolic acid and their derivatives by pkCSM                                          |
| Page S28 | Table S13 Molecular docking results of ursolic acid, corosolic acid and their derivatives with COX-2 enzyme (PDB: 5FDQ)                                       |
| Page S29 | Table S14 Molecular docking results of ursolic acid, corosolic acid and their derivatives with the EGFR kinase domain (non-small lung cancer, PDB: 2GS2)      |

|          |                                                                                                                                                   |
|----------|---------------------------------------------------------------------------------------------------------------------------------------------------|
| Page S30 | Table S15 Molecular docking results of ursolic acid, corosolic acid and their derivatives with chimaeric Bcl2-xL (breast cancer MCF-7, PDB: 2W3L) |
| Page S31 | Table S16 Molecular docking results of ursolic acid, corosolic acid and their derivatives with kappaB kinase beta (PDB: 3RZF)                     |
| Page S32 | References                                                                                                                                        |

## 1 Experimental Process

### <sup>1</sup>H-NMR analysis

The <sup>1</sup>H-NMR spectrum results of samples in this research were recorded by a JEOL JNM-ECS 400 MHz spectrometer. Typically, 100 mg sample from the experiment was dissolved in 1 ml chloroform-d. 16 scans were used for the <sup>1</sup>H-NMR testing. The data of <sup>1</sup>H-NMR was processed and analyzed by ACD/NMR Processor Academic Edition software (Ver. 12.01).

### Control experiments for all the substrates investigated in this research

Control experiments run in the absence of catalyst were conducted for all reactants discussed in this research, results are listed in Table S1. This demonstrates that acidic catalysts are vital for the carboxymethylation, methylation and dehydration reaction.

## 2 Characterisation of structures of products

### Cyclohexanol structure and <sup>1</sup>H-NMR

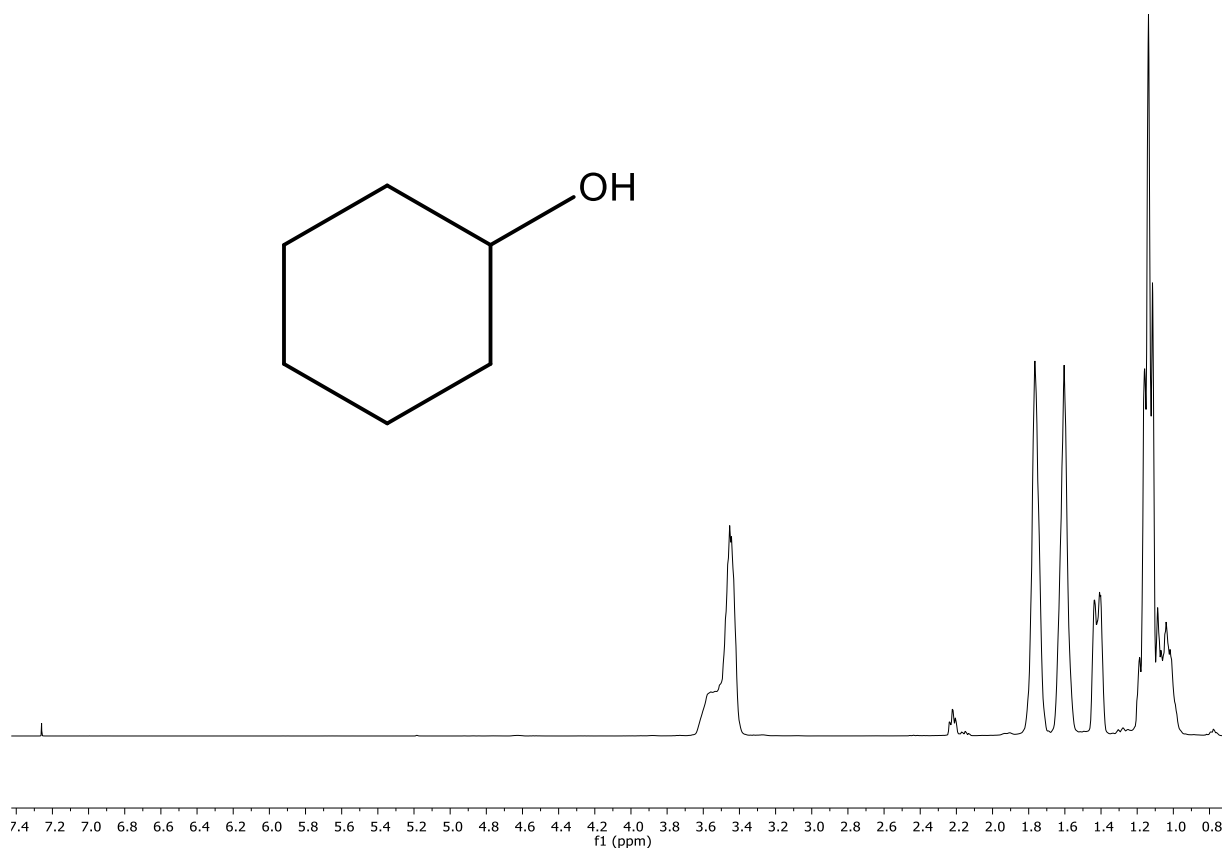

Figure S1. <sup>1</sup>H-NMR of cyclohexanol in CDCl<sub>3</sub>

## Structure, $^1\text{H-NMR}$ and $^{13}\text{C-NMR}$ of ursolic acid

Ursolic acid.  $^1\text{H-NMR}$  ( $\text{CDCl}_3$ ):  $\delta$  5.26 (t, 1H), 3.20-3.24 (dd, 1H).

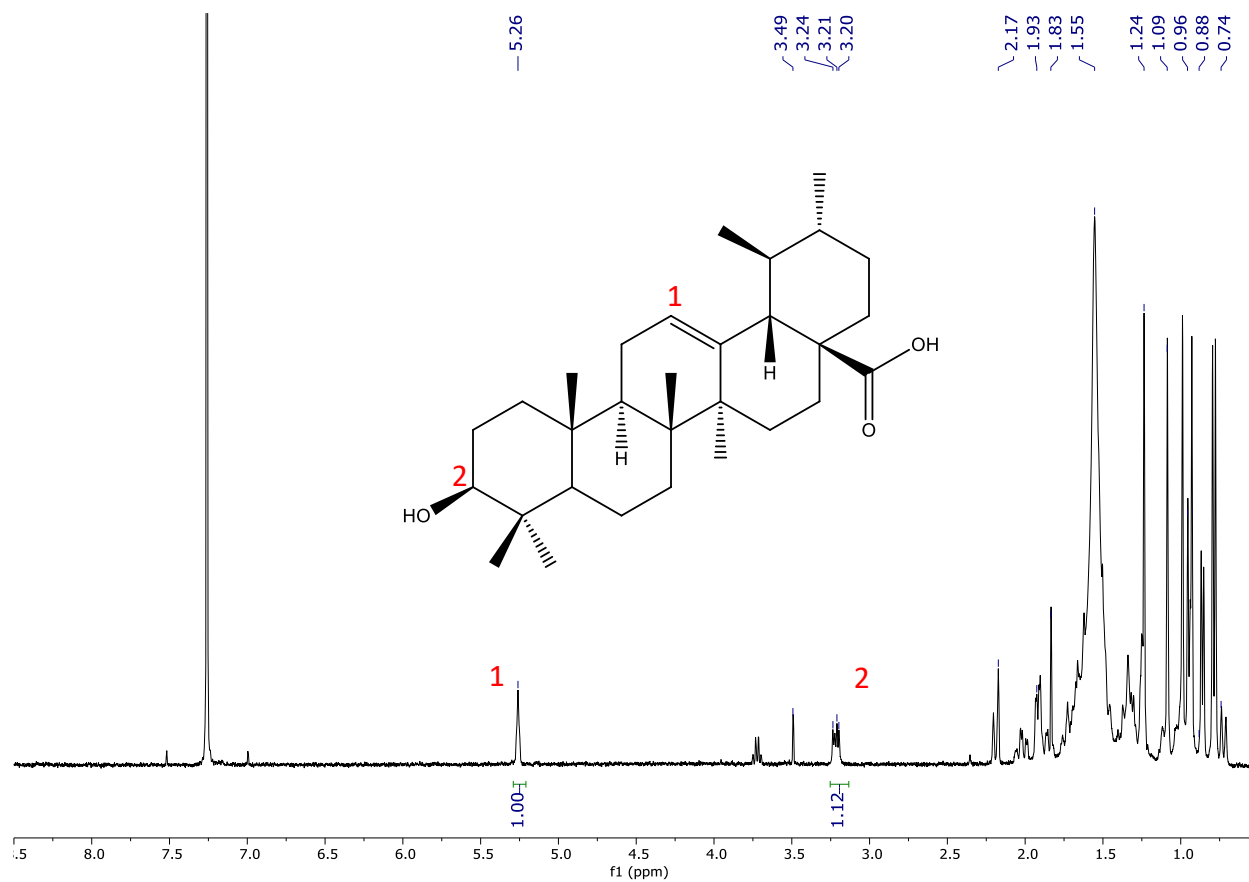

Figure S2.  $^1\text{H-NMR}$  of ursolic acid in  $\text{CDCl}_3$

## Structure, $^1\text{H-NMR}$ and $^{13}\text{C-NMR}$ of ursolic acid ester

### $3\beta$ -[[methoxy]carbonyl]oxyurs-12-en-28-oic acid (Carboxymethylation product)

$3\beta$ -[[methoxy]carbonyl]oxyurs-12-en-28-oic acid.  $^1\text{H-NMR}$  ( $\text{CDCl}_3$ ):  $\delta$  5.24-5.25 (t, 1H), 4.31-4.35 (dd, 1H), 3.77 (s, 3H).

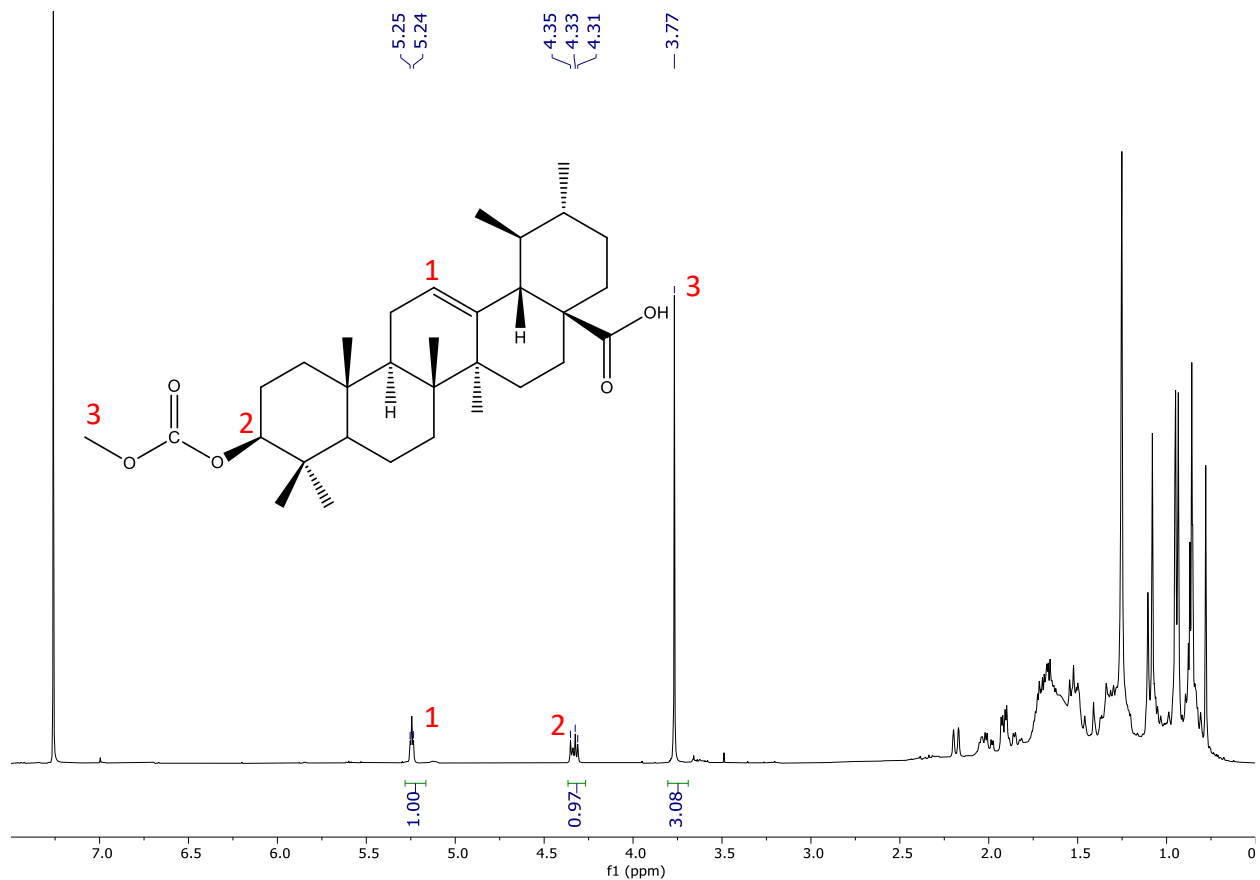

Figure S3.  $^1\text{H-NMR}$  of  $3\beta$ -[[methoxy]carbonyl]oxyurs-12-en-28-oic acid in  $\text{CDCl}_3$

**3 $\beta$ -methoxyurs-12-en-28-oic acid (Methylation product)**

3 $\beta$ -methoxyurs-12-en-28-oic acid.  $^1\text{H-NMR}$  ( $\text{CDCl}_3$ ):  $\delta$  5.22-5.26 (t, 1H), 4.25-4.28 (dd, 1H), 3.59(m, 3H).

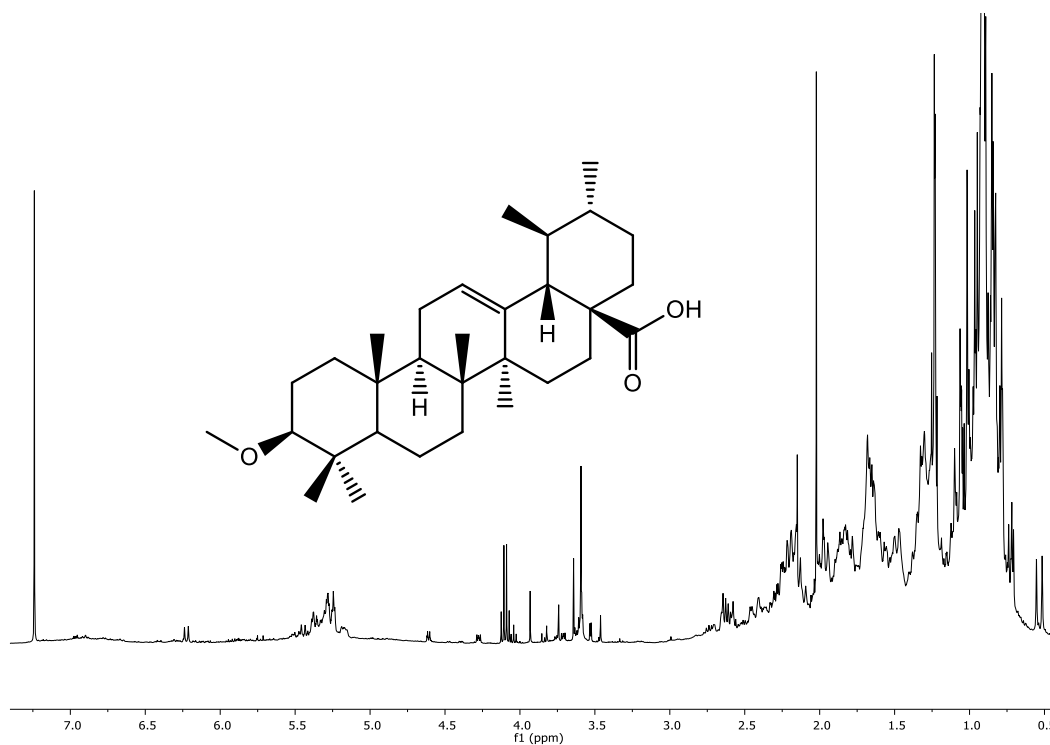

Figure S4.  $^1\text{H-NMR}$  of 3 $\beta$ -methoxyurs-12-en-28-oic acid in  $\text{CDCl}_3$

**3 $\beta$ -formylurs-12-en-28-oic acid (3-formyl ursolic acid ester)**

3 $\beta$ -formylurs-12-en-28-oic acid.  $^1\text{H-NMR}$  ( $\text{CDCl}_3$ ):  $\delta$  5.2 (t, 1H), 4.6 (dd, 1H), 8.09(s, 1H).

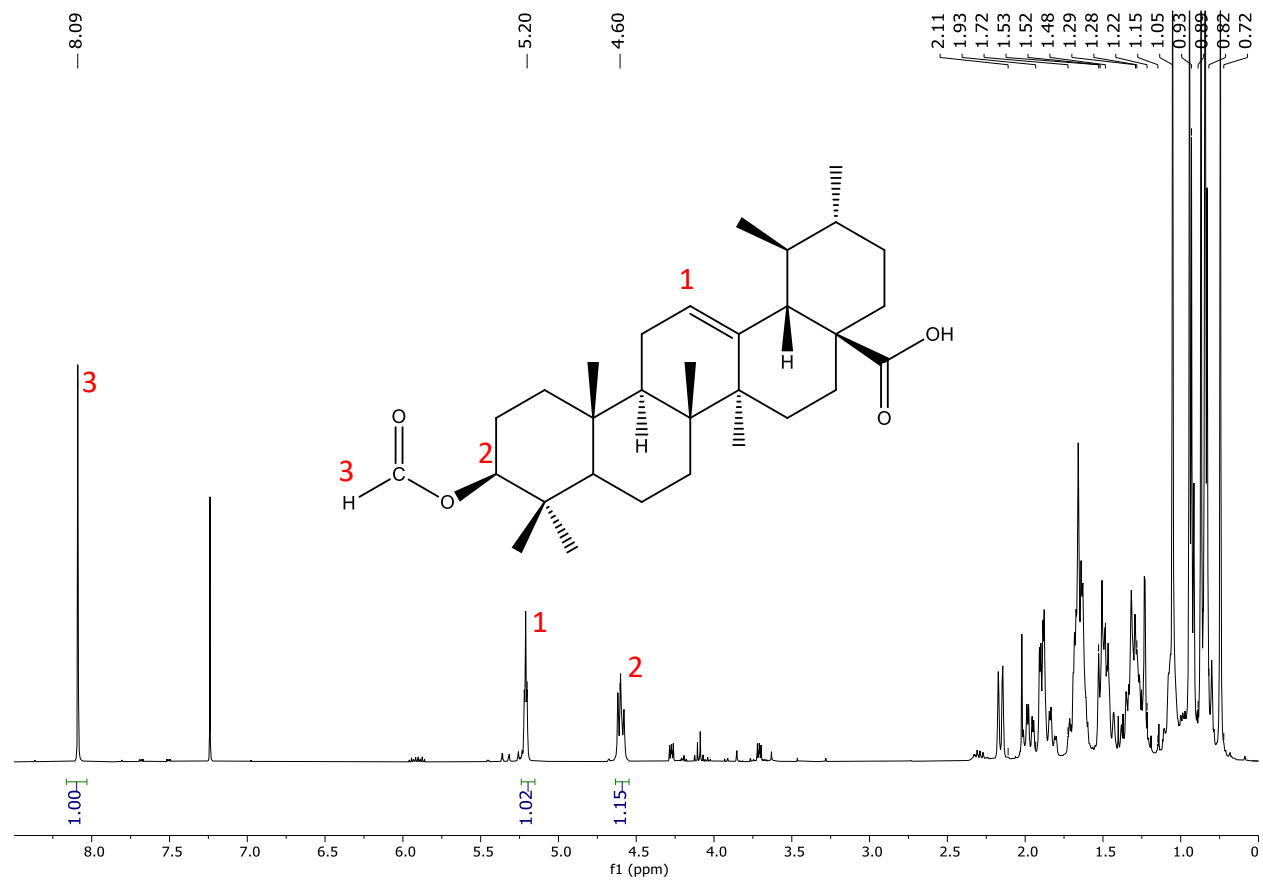

Figure S5.  $^1\text{H-NMR}$  of 3 $\beta$ -formylurs-12-en-28-oic acid in  $\text{CDCl}_3$

**urs-2,12-dien-28-oic acid (Dehydration product)**

Urs-2,12-dien-28-oic acid.  $^1\text{H-NMR}$  ( $\text{CDCl}_3$ ):  $\delta$  5.40 (t, 1H), 5.23-5.37 (dd, 2H), 2.67(m, 1H).

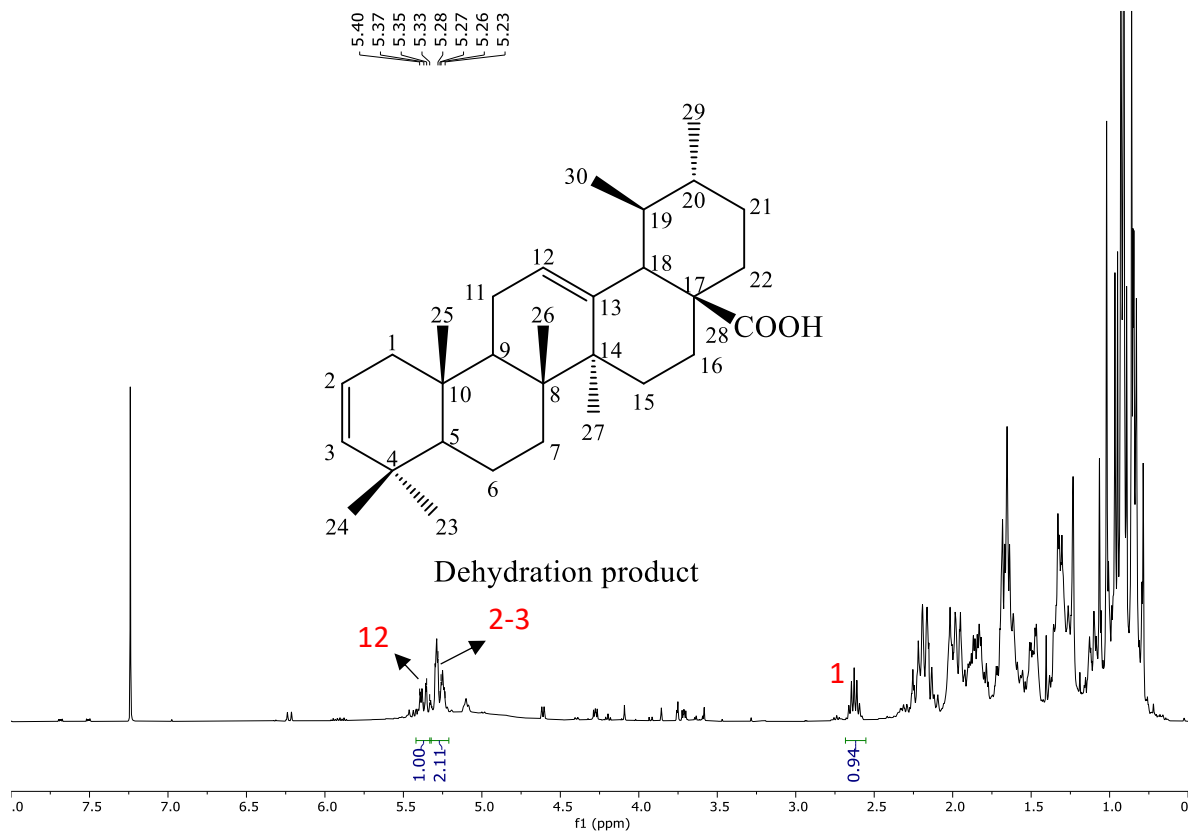

Figure S6.  $^1\text{H-NMR}$  of urs-2,12-dien-28-oic acid in  $\text{CDCl}_3$



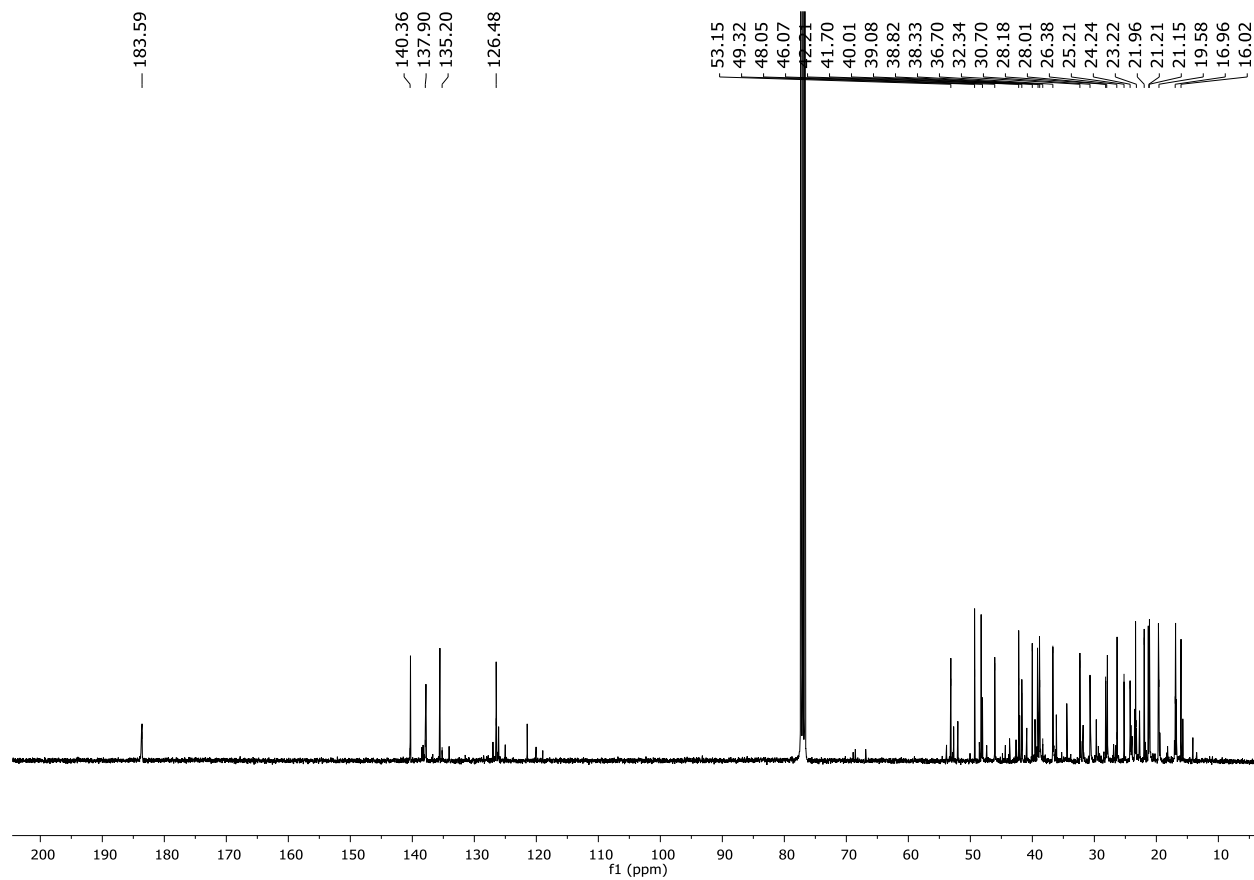

Figure S7.  $^{13}\text{C}$ NMR of urs-2,12-dien-28-oic acid in  $\text{CDCl}_3$

### 3 Carboxymethylation and/or methylation

#### Carboxymethylation and/or methylation of cyclohexanol

Table S1 the conversion and selectivity of carboxymethylation and/or methylation reactions with cyclohexanol and acids.

| Brønsted acid-catalysed                                             | Conversion (%) | GC-MS Selectivity (%) |                            |                    |
|---------------------------------------------------------------------|----------------|-----------------------|----------------------------|--------------------|
|                                                                     |                | Methylation product   | Carboxymethylation product | other              |
| Formic acid                                                         | 69             | 0.00                  | 10.13                      | 89.87 <sup>a</sup> |
| PTSA                                                                | 95.3           | 11.87                 | 85.25                      | 2.88               |
| H <sub>2</sub> SO <sub>4</sub>                                      | 99.7           | 2.81                  | 0.99                       | 96.20 <sup>b</sup> |
| HCl                                                                 | 53.1           | 0.00                  | 78.32                      | 21.68              |
| Lewis acid-catalyzed                                                |                |                       |                            |                    |
| ZnCl <sub>2</sub>                                                   | 87.9           | 0.00                  | 87.24                      | 12.76              |
| FeCl <sub>3</sub>                                                   | 100            | 58.26                 | 1.08                       | 40.67              |
| AlCl <sub>3</sub> •6H <sub>2</sub> O                                | 55.3           | 0.00                  | 36.12                      | 63.88              |
| Heterogenous cat.                                                   |                |                       |                            |                    |
| H <sub>2</sub> SO <sub>4</sub> -SiO <sub>2</sub>                    | 93.0           | 5.29                  | 85.90                      | 8.81               |
| HClO <sub>4</sub> -SiO <sub>2</sub>                                 | 45.1           | 0.00                  | 89.29                      | 10.71              |
| Zeolite β (25:1 SiO <sub>2</sub> : Al <sub>2</sub> O <sub>3</sub> ) | 38.3           | 0.00                  | 51.62                      | 48.38              |

<sup>a</sup> Formyl cyclohexane product

<sup>b</sup> Cyclohexene product

The %conversion and %selectivity were calculated by peak area of GC and GC-MS.

## Carboxymethylation and/or methylation of ursolic acid

Table S2 the yield and the conversion of ursolic acid ester synthesized from ursolic acid, acid catalysts, and DMC in various conditions.

| Acid                                                               | condition | Conversion (%) | Yield to carboxymethylation product (%) | Selectivity (%)            |                     |                     |       |
|--------------------------------------------------------------------|-----------|----------------|-----------------------------------------|----------------------------|---------------------|---------------------|-------|
|                                                                    |           |                |                                         | Carboxymethylation product | Methylation product | Dehydration product | Etc.  |
| PTSA<br>1 equivalent                                               | 90        | 38.6           | 11.01                                   | >99                        | -                   | -                   | -     |
|                                                                    | 150       | 51.2           | 36.06                                   | 69.72                      | 0                   | 23.37               | 6.91  |
| PTSA<br>5 equivalents                                              | 90        | 74             | 45.54                                   | 59.81                      | 0                   | 33.27               | 6.92  |
|                                                                    | 150       | 79.8           | 32.83                                   | 40.90                      | 0                   | 55.06               | 4.04  |
| PTSA<br>10 equivalents                                             | 90        | 25.4           | 2.13                                    | 8.23                       | 0                   | 56.33               | 35.44 |
|                                                                    | 150       | 51.60          | 15.28                                   | 29.31                      | 0                   | 57.97               | 12.72 |
| FeCl <sub>3</sub><br>0.5 equivalent                                | 90        | -              | -                                       | -                          | -                   | -                   | -     |
|                                                                    | 150       | 52.6           | 46.6                                    | -                          | 87.7                | -                   | 12.3  |
| FeCl <sub>3</sub><br>1 equivalent                                  | 90        | -              | -                                       | -                          | -                   | -                   | -     |
|                                                                    | 150       | >99%           | -                                       | <1%                        | >99%                | -                   | -     |
| FeCl <sub>3</sub><br>5 equivalents                                 | 90        | -              | -                                       | -                          | -                   | -                   | -     |
|                                                                    | 150       | >99%           | -                                       | <1%                        | >99%                | -                   | -     |
| FeCl <sub>3</sub><br>10 equivalents                                | 90        | -              | -                                       | -                          | -                   | -                   | -     |
|                                                                    | 150       | >99%           | -                                       | <1%                        | >99%                | -                   | -     |
| ZnCl <sub>2</sub><br>5 equivalents                                 | 90        | -              | -                                       | -                          | -                   | -                   | -     |
|                                                                    | 150       | 50             | 11.89                                   | 23.56                      | -                   | 70.13               | 6.31  |
| ZnCl <sub>2</sub><br>10 equivalents                                | 90        | -              | -                                       | -                          | -                   | -                   | -     |
|                                                                    | 150       | 80.8           | 25.20                                   | 35.1                       | -                   | 45.3                | 19.6  |
| H <sub>2</sub> SO <sub>4</sub> -SiO <sub>2</sub><br>5 equivalents  | 90        | 87.5           | 17.40                                   | 19.88                      | -                   | 74.50               | 5.62  |
|                                                                    | 150       | 78.27          | 23.18                                   | 29.74                      | -                   | 40.37               | 29.81 |
| H <sub>2</sub> SO <sub>4</sub> -SiO <sub>2</sub><br>10 equivalents | 90        | 78.4           | 18.65                                   | 23.62                      | -                   | 54.11               | 22.27 |
|                                                                    | 150       | 69.81          | 9.06                                    | 13.10                      | -                   | 77.46               | 9.43  |

Table S3 the yield and the conversion of ursolic acid ester synthesized from ursolic acid, formic acid, and DMC in various conditions.

| Acid                                 | condition | Conversion (%) | Yield to Formyl ursolic acid ester product (%) | Selectivity (%)                   |       |
|--------------------------------------|-----------|----------------|------------------------------------------------|-----------------------------------|-------|
|                                      |           |                |                                                | Formyl ursolic acid ester product | Etc.  |
| Formic acid<br>5 equivalents         | 90        | 82.2           | 69.11                                          | 85.52                             | 14.48 |
|                                      | 150       | 58.4           | 78.39                                          | 99.34                             | 0.66  |
| Formic acid<br>Excess<br>without DMC | 90        | 100            | 100                                            | 100                               | 0     |

The %conversion and %selectivity were calculated by formula below;

$$\% \text{ Conversion of alcohol} = \frac{\text{Initial moles of alcohol} - \text{Final moles of alcohol}}{\text{Initial moles of alcohol}} \times 100$$

$$\% \text{ Selectivity} = \frac{\text{Moles of desired product}}{\text{Moles of alcohol converted}} \times 100$$

### Carboxymethylation mechanism of PTSA

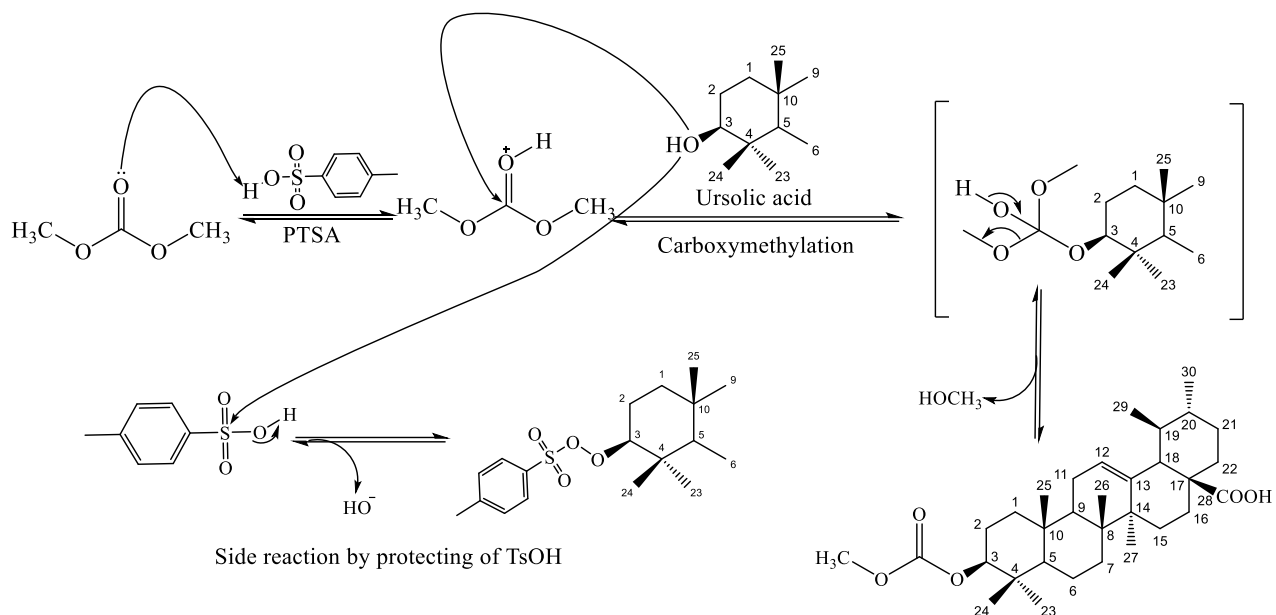

Figure S8. Possible mechanism for carboxymethylation reaction of PTSA and side reaction of high amount of PTSA.

### Carboxymethylation mechanism of PTSA

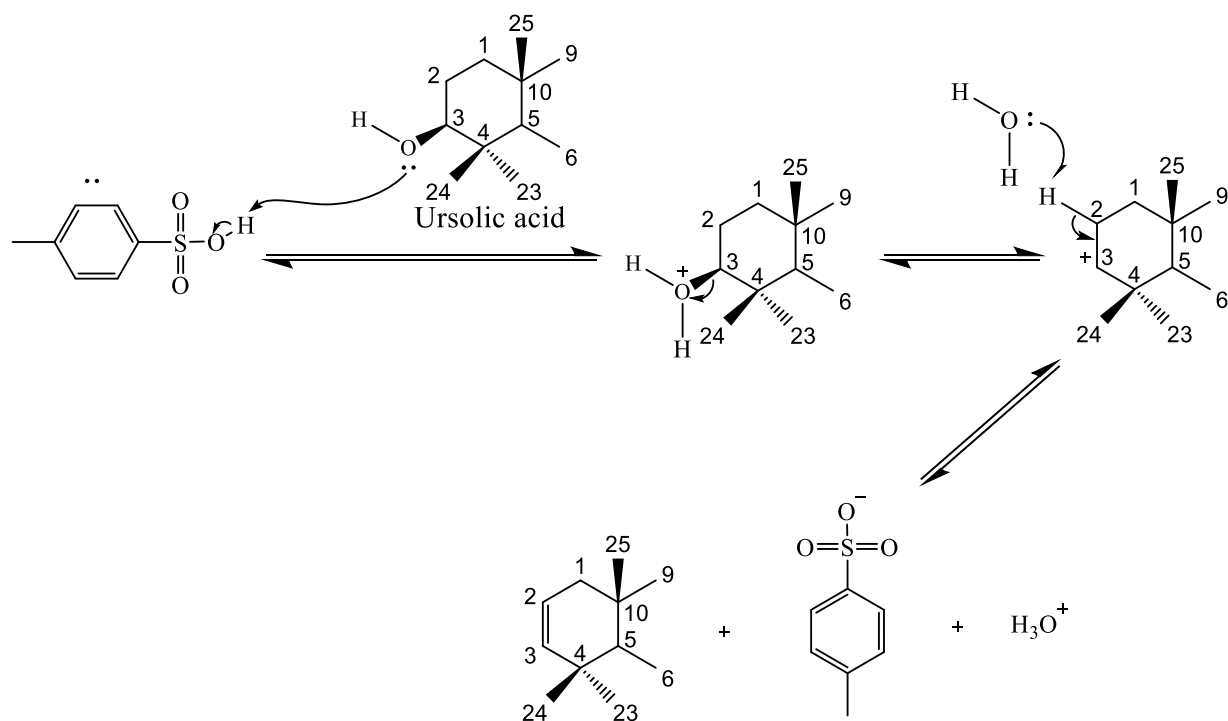

Figure S9. Possible dehydration mechanism of ursolic acid with DMC and PTSA.

### Esterification mechanism of formic acid

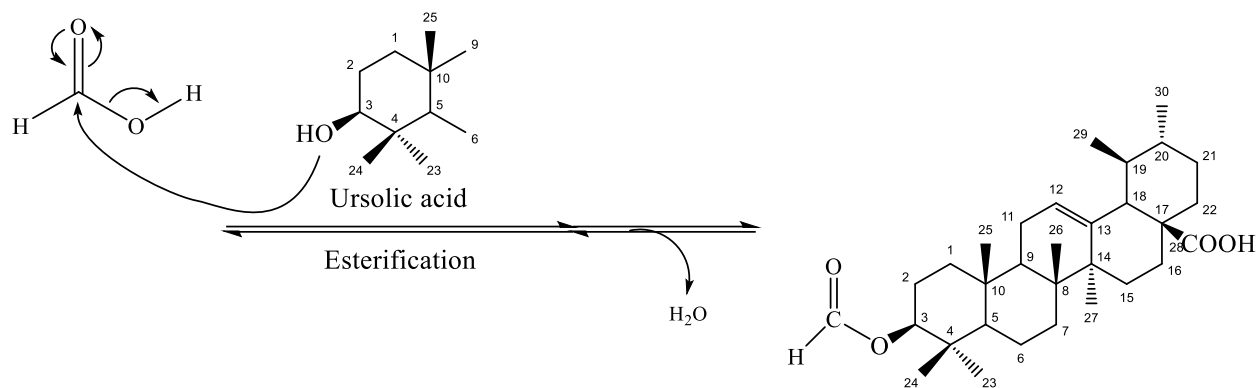

Figure S10. Possible esterification mechanism of ursolic acid with formic acid.

### Carboxymethylation mechanism of $\text{H}_2\text{SO}_4\text{-SiO}_2$

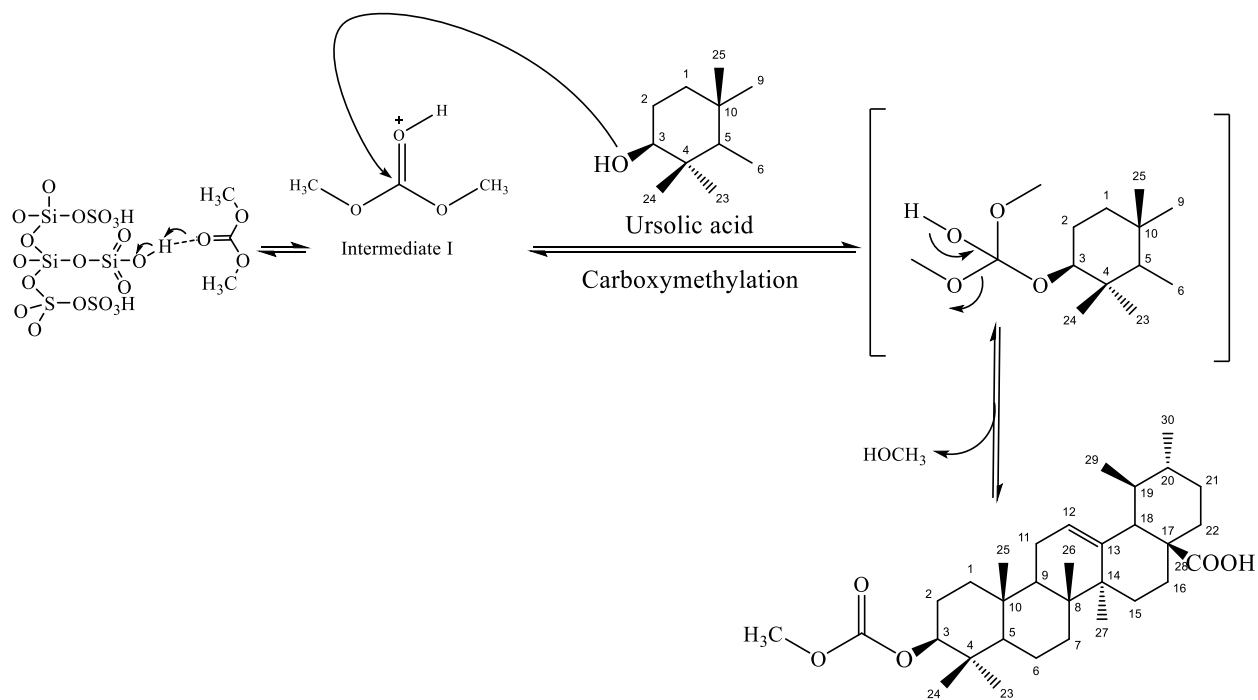

Figure S11. Possible Carboxymethylation mechanism of ursolic acid with DMC and  $\text{H}_2\text{SO}_4\text{-SiO}_2$ .

#### 4. Green metrics calculations<sup>1,2</sup>

Current methods (PTSA, HCO<sub>2</sub>H and FeCl<sub>3</sub>)

Carboxymethylation

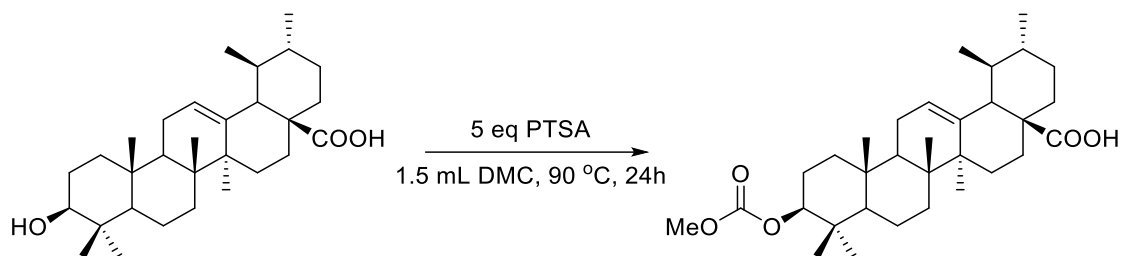

Formylation

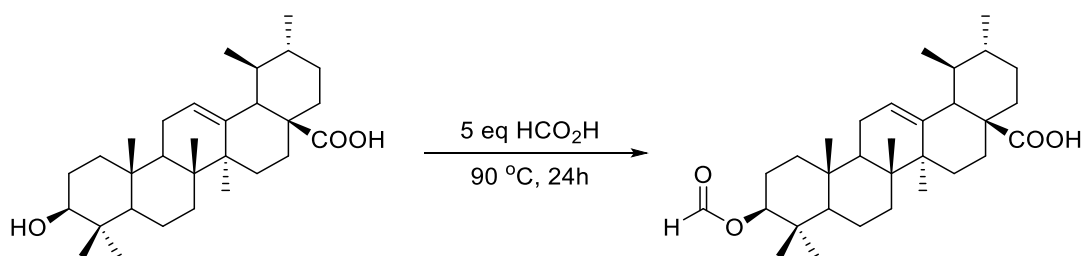

Methylation

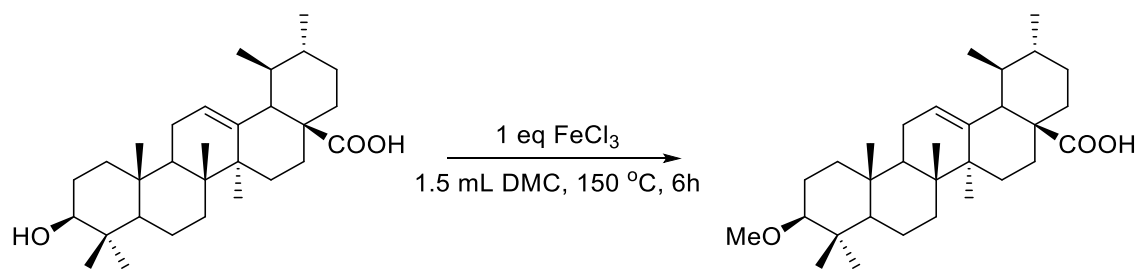

| Role               | Chemical                                                    | Mass (g) | Volume (mL) | Density (g/mL) |
|--------------------|-------------------------------------------------------------|----------|-------------|----------------|
| <b>Reaction</b>    |                                                             |          |             |                |
| Reactant           | Ursolic acid                                                | 0.05     |             |                |
| Reactant (1 eq)    | DMC                                                         | 0.013    | 0.012       | 1.07           |
| Reagent            | PTSA                                                        | 0.095    |             |                |
| Reactant (1 eq)    | HCO <sub>2</sub> H                                          | 0.005    | 0.004       | 1.22           |
| Reagent            | FeCl <sub>3</sub>                                           | 0.018    |             |                |
| Solvent            | DMC                                                         | 1.59     | 1.488       | 1.07           |
| Solvent (4 eq)     | HCO <sub>2</sub> H                                          | 0.02     | 0.016       | 1.22           |
|                    | <b>Reaction total (PTSA)</b>                                | 1.748    |             |                |
|                    | <b>Reaction total (HCO<sub>2</sub>H)</b>                    | 0.075    |             |                |
|                    | <b>Reaction total (FeCl<sub>3</sub>)</b>                    | 1.671    |             |                |
| <b>Work-up</b>     |                                                             |          |             |                |
| Extraction solvent | Ethyl acetate                                               | 2.255    | 2.5         | 0.902          |
| Extraction solvent | Water                                                       | 2.5      | 2.5         | 1.0            |
| CC                 | Silica-gel column                                           | 35       |             |                |
| Solvent            | Ethyl acetate                                               | 45.1     | 50          | 0.902          |
|                    | Hexane                                                      | 33.05    | 50          | 0.661          |
|                    | <b>Work-up total (HCO<sub>2</sub>H or FeCl<sub>3</sub>)</b> | 4.755    |             |                |
|                    | <b>Work-up total (PTSA)</b>                                 | 117.905  |             |                |
|                    | <b>Reaction and work-up total (PTSA)</b>                    | 119.653  |             |                |
|                    | <b>Reaction and work-up total (HCO<sub>2</sub>H)</b>        | 4.83     |             |                |
|                    | <b>Reaction and work-up total (FeCl<sub>3</sub>)</b>        | 6.426    |             |                |
| <b>Product</b>     |                                                             |          |             |                |
| Product            | Carboxymethylation (PTSA)                                   | 0.026    |             |                |
| Product            | Formylation (HCO <sub>2</sub> H)                            | 0.053    |             |                |
| Product            | Methylation (FeCl <sub>3</sub> )                            | 0.052    |             |                |

### Carboxymethylation (PTSA)

$$\text{PMI (reaction)} = \frac{\text{Total mass in reaction}}{\text{Mass of product}} = \frac{1.748}{0.026} = 67.23$$

$$\text{PMI (workup)} = \frac{\text{Total mass used for workup}}{\text{Mass of product}} = \frac{117.905}{0.026} = 4,534.81$$

$$\text{PMI (total)} = \frac{\text{Total mass process}}{\text{Mass of product}} = \frac{119.653}{0.026} = 755.88$$



$$\text{E factor} = \frac{\text{Total mass of waste}}{\text{Mass of product}} = \frac{119.653 - 0.026}{0.026} = 754.88$$

$$\text{SI} = \frac{\text{Total mass of solvent}}{\text{Mass of product}} = \frac{1.59+2.255+45.1+33.05}{0.026} = 4,424.81$$

$$\text{WI} = \frac{\text{Total mass of water}}{\text{Mass of product}} = \frac{2.5}{0.026} = 96.15$$

### Formylation (HCO<sub>2</sub>H)

$$\text{PMI (reaction)} = \frac{\text{Total mass in reaction}}{\text{Mass of product}} = \frac{0.075}{0.053} = 1.42$$

$$\text{PMI (workup)} = \frac{\text{Total mass used for workup}}{\text{Mass of product}} = \frac{4.755}{0.053} = 89.72$$

$$\text{PMI (total)} = \frac{\text{Total mass process}}{\text{Mass of product}} = \frac{4.83}{0.053} = 91.13$$

$$\text{E factor} = \frac{\text{Total mass of waste}}{\text{Mass of product}} = \frac{4.83 - 0.053}{0.053} = 90.13$$

$$\text{SI} = \frac{\text{Total mass of solvent}}{\text{Mass of product}} = \frac{0.02+2.255}{0.053} = 42.92$$

$$\text{WI} = \frac{\text{Total mass of water}}{\text{Mass of product}} = \frac{2.5}{0.053} = 47.17$$

### Methylation (FeCl<sub>3</sub>)

$$\text{PMI (reaction)} = \frac{\text{Total mass in reaction}}{\text{Mass of product}} = \frac{1.671}{0.052} = 32.13$$

$$\text{PMI (workup)} = \frac{\text{Total mass used for workup}}{\text{Mass of product}} = \frac{4.755}{0.052} = 91.44$$

$$\text{PMI (total)} = \frac{\text{Total mass process}}{\text{Mass of product}} = \frac{6.426}{0.052} = 123.58$$

$$\text{E factor} = \frac{\text{Total mass of waste}}{\text{Mass of product}} = \frac{6.426 - 0.052}{0.052} = 122.58$$

$$\text{SI} = \frac{\text{Total mass of solvent}}{\text{Mass of product}} = \frac{1.59 + 2.255}{0.052} = 73.94$$

$$\text{WI} = \frac{\text{Total mass of water}}{\text{Mass of product}} = \frac{2.5}{0.052} = 48.08$$

### Previous method for formylation ( $\text{HCO}_2\text{H}$ )<sup>1</sup>

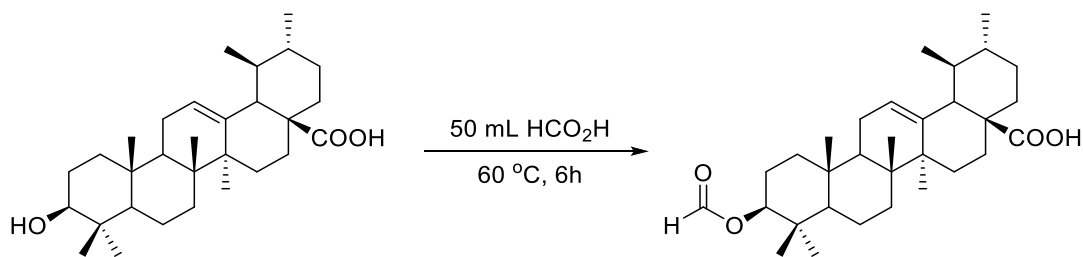

Experimental Procedures: A mixture of ursolic acid (1) (500 mg, 1.1 mmol) and  $\text{HCO}_2\text{H}$  (50 mL) was stirred at  $60^\circ\text{C}$  for 6 h. The solvent was distilled off and the residue was dried at reduced pressure. The crude product was taken up in benzene and percolated through a silica gel column to give formylursolic acid (480 mg, 90%).

| Role            | Chemical                          | Mass (g) | Volume (mL) | Density (g/mL) |
|-----------------|-----------------------------------|----------|-------------|----------------|
| <b>Reaction</b> |                                   |          |             |                |
| Reactant        | Ursolic acid                      | 0.5      |             |                |
| Reactant (1 eq) | $\text{HCO}_2\text{H}$            | 0.05     | 0.04        | 1.22           |
| Solvent         | $\text{HCO}_2\text{H}$            | 60.95    | 49.96       | 1.22           |
|                 | <b>Reaction total</b>             | 61.5     |             |                |
| <b>Work-up</b>  |                                   |          |             |                |
| CC              | Silica-gel column                 | 50       |             |                |
| Solvent         | Benzene                           | 83.22    | 95          | 0.876          |
|                 | <b>Work-up total</b>              | 133.22   |             |                |
|                 | <b>Reaction and work-up total</b> | 194.72   |             |                |
| <b>Product</b>  |                                   |          |             |                |
| Product         | Formylation                       | 0.48     |             |                |

$$\text{PMI (reaction)} = \frac{\text{Total mass in reaction}}{\text{Mass of product}} = \frac{61.5}{0.48} = 128.125$$

$$\text{PMI (workup)} = \frac{\text{Total mass used for workup}}{\text{Mass of product}} = \frac{133.22}{0.48} = 277.54$$

$$\text{PMI (total)} = \frac{\text{Total mass process}}{\text{Mass of product}} = \frac{194.72}{0.48} = 405.67$$

$$E = \frac{\text{Total mass of waste}}{\text{Mass of product}} = \frac{194.72 - 0.48}{0.48} = 404.67$$

$$SI = \frac{\text{Total mass of solvent}}{\text{Mass of product}} = \frac{60.95 + 83.22}{0.48} = 300.35$$

$$WI = \frac{\text{Total mass of water}}{\text{Mass of product}} = \frac{0}{0.48} = 0$$

### Previous method for methylation (NaH, MeI)<sup>2</sup>

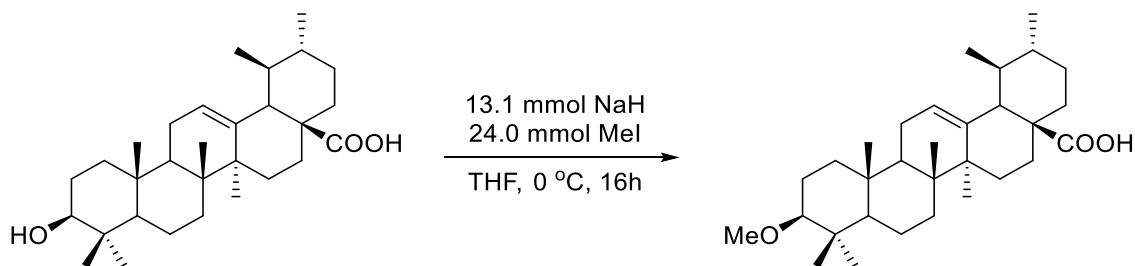

Experimental Procedures: To a suspension of NaH (526 mg, 13.1 mmol) in THF (5 mL) was added a solution of ursolic acid (500 mg, 1.09 mmol) in THF (20 mL) at 0 °C, and the mixture was stirred at the same temperature for 1 h. MeI (1.5 mL, 24.0 mmol) was added dropwise, and the solution was stirred in ice-bath for 16 h. The solution was diluted with EtOAc and washed with water and saturated NH<sub>4</sub>Cl. The water phases were washed with EtOAc and combined organic layer was dried over anhydrous Na<sub>2</sub>SO<sub>4</sub> and concentrated. The residue was purified by column chromatography (EtOAc/n-hexane = 1:5) to provide product as a white solid (314 mg, 59%).

| Role            | Chemical     | Mass (g) | Volume (mL) | Density (g/mL) |
|-----------------|--------------|----------|-------------|----------------|
| <b>Reaction</b> |              |          |             |                |
| Reactant        | Ursolic acid | 0.5      |             |                |
| Reactant        | NaH          | 0.526    |             |                |
| Reagent         | MeI          | 3.42     | 1.5         | 2.28           |

|                    |                                   |         |    |       |
|--------------------|-----------------------------------|---------|----|-------|
| Solvent            | THF                               | 22.2    | 25 | 0.888 |
|                    | <b>Reaction total</b>             | 26.646  |    |       |
| <b>Work-up</b>     |                                   |         |    |       |
| Extraction solvent | EtOAc                             | 45.1    | 50 | 0.902 |
| Extraction solvent | NH <sub>4</sub> Cl                | 38.25   | 25 | 1.53  |
| CC                 | Silica-gel column                 | 50      |    |       |
| Solvent            | EtOAc                             | 15.334  | 17 | 0.902 |
| Solvent            | n-Hexane                          | 54.697  | 83 | 0.659 |
|                    | <b>Work-up total</b>              | 203.381 |    |       |
|                    | <b>Reaction and work-up total</b> | 230.027 |    |       |
| <b>Product</b>     |                                   |         |    |       |
| Product            | Methylation                       | 0.314   |    |       |

$$\text{PMI (reaction)} = \frac{\text{Total mass in reaction}}{\text{Mass of product}} = \frac{26.646}{0.314} = 85.86$$

$$\text{PMI (workup)} = \frac{\text{Total mass used for workup}}{\text{Mass of product}} = \frac{203.381}{0.314} = 647.71$$

$$\text{PMI (total)} = \frac{\text{Total mass process}}{\text{Mass of product}} = \frac{230.027}{0.314} = 732.57$$

$$E = \frac{\text{Total mass of waste}}{\text{Mass of product}} = \frac{230.027 - 0.314}{0.314} = 731.57$$

$$SI = \frac{\text{Total mass of solvent}}{\text{Mass of product}} = \frac{22.2 + 45.1 + 15.334 + 54.697}{0.314} = 437.36$$

$$WI = \frac{\text{Total mass of water}}{\text{Mass of product}} = \frac{38.25}{0.314} = 121.82$$

## 5. Carboxymethylation, methylation and formylation of Menthol

Table S4 the yield, conversion and selectivity of carboxymethylation and methylation of menthol with DMC in difference acidic conditions<sup>a</sup>.

| Acid              | Condition        |             | Conversion (%) | Major product      | Yield (%) | GC-MS Selectivity (%) |       |
|-------------------|------------------|-------------|----------------|--------------------|-----------|-----------------------|-------|
|                   | Temperature (°C) | Time (Hour) |                |                    |           | Major product         | Other |
| PTSA              | 90               | 24          | 98.84          | Carboxymethylation | 92.60     | 93.67                 | 6.33  |
| FeCl <sub>3</sub> | 150              | 6           | 93.42          | Methylation        | 54.57     | 58.41                 | 51.59 |
| Formic acid       | 90               | 24          | 90.63          | Formylation        | 90        | >99                   | <1    |

<sup>a</sup> condition; Methol : acid = 1:5 in excess DMC.

The %conversion and %selectivity were calculated by peak area of GC-MS.

## 6. Carboxymethylation, methylation and formylation of Corosolic acid

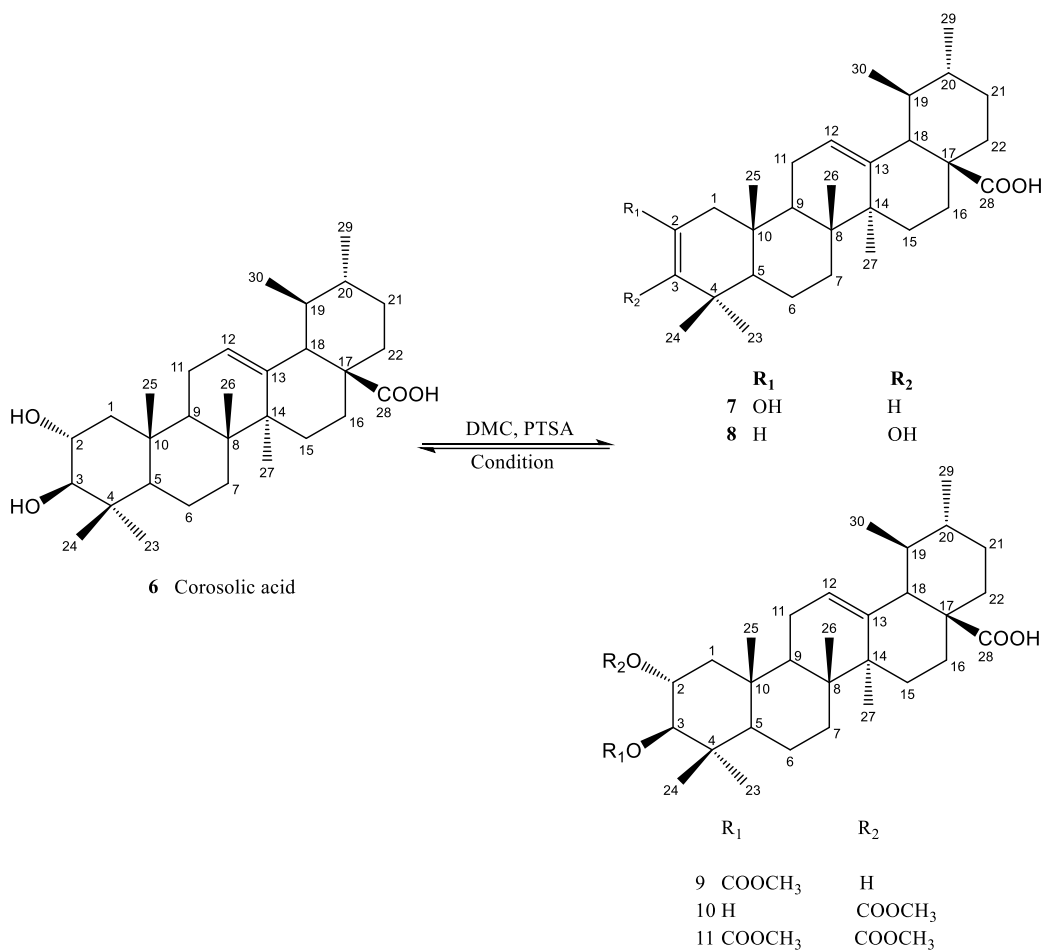

Figure S12 Reaction of corosolic acid with DMC in PTSA condition

**Table S5** The yield and selectivity of carboxymethylation and methylation of corosolic acid with DMC in PTSA condition with 63% conversion. (Corosolic acid : PTSA : DMC = 1 : 5 : 160 at 90 °C for 24 hours)

| Products | Yield% | Selectivity (%) |
|----------|--------|-----------------|
| 7        | 6.61   | 10.42           |
| 8        | 8.40   | 13.23           |
| 9        | 9.26   | 14.60           |
| 10       | 10.10  | 15.92           |
| 11       | 3.55   | 5.60            |

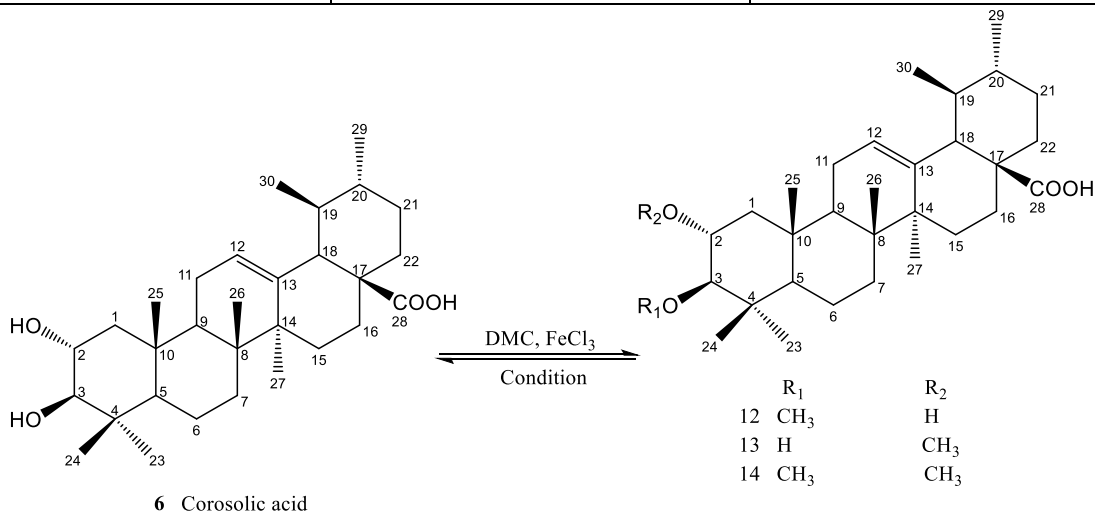

**Figure S13** Reaction of corosolic acid with DMC in FeCl<sub>3</sub> condition

**Table S6** The yield and selectivity of carboxymethylation and methylation of corosolic acid with DMC in PTSA condition with 85% conversion. (Corosolic acid : FeCl<sub>3</sub> : DMC = 1 : 5 : 160 at 150 °C for 6 hours)

| Products | Yield% | Selectivity (%) |
|----------|--------|-----------------|
| 9        | 21.24  | 24.98           |
| 12       | 12.33  | 14.50           |
| 13       | 11.77  | 13.84           |
| 14       | 3.45   | 4.06            |

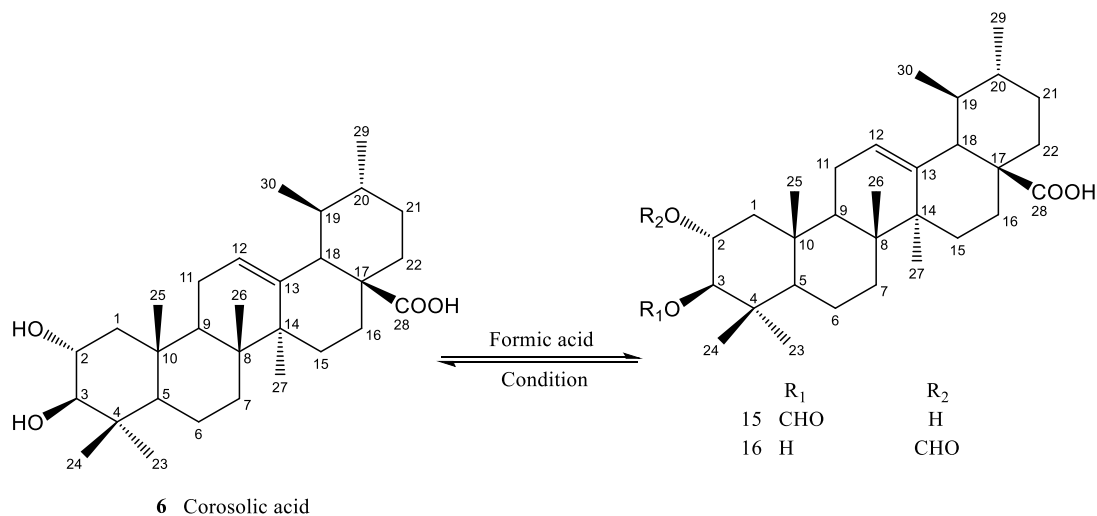

Figure S14 Reaction of corosolic acid with DMC in formic acid condition

**Table S7** The yield and selectivity of formylation of corosolic acid without DMC in formic acid condition with 83.46% conversion. (Corosolic acid : Formic acid = 1 : 5 at 90 °C for 24 hours)

| Products | Yield% | Selectivity (%) |
|----------|--------|-----------------|
| 15       | 35.03  | 41.97           |
| 16       | 15.44  | 18.50           |

**Table S8** The yield and selectivity of formylation of corosolic acid with DMC in formic acid condition with 22.20% conversion. (Corosolic acid : Formic acid = 1 : 5 : DMC = 1 : 5 : 160 at 90 °C for 24 hours)

| Products | Yield% | Selectivity (%) |
|----------|--------|-----------------|
| 15       | 3.36   | 15.20           |
| 16       | 11.44  | 51.51           |

The %conversion and %selectivity were calculated by formula below;

$$\% \text{ Conversion of alcohol} = \frac{\text{Initial moles of alcohol} - \text{Final moles of alcohol}}{\text{Initial moles of alcohol}} \times 100$$

$$\% \text{ Selectivity} = \frac{\text{Moles of desired product}}{\text{Moles of alcohol converted}} \times 100$$

**Table S9** Physicochemical parameters and Lipinski's rule of five of ursolic acid, corosolic acid and their derivatives using the SwissADME predictive database<sup>a</sup>

| <b>Compound</b> | <b>MW</b> | <b>logP</b> | <b>nHBA</b> | <b>nHBD</b> | <b>RO5</b> |
|-----------------|-----------|-------------|-------------|-------------|------------|
| <b>1</b>        | 456.711   | 7.0895      | 2           | 2           | 1          |
| <b>2</b>        | 470.738   | 7.7436      | 2           | 1           | 1          |
| <b>3</b>        | 514.747   | 7.8802      | 4           | 1           | 2          |
| <b>4</b>        | 484.721   | 7.2702      | 3           | 1           | 1          |
| <b>5</b>        | 438.696   | 7.8947      | 1           | 1           | 1          |
| <b>6</b>        | 472.71    | 6.0603      | 3           | 3           | 1          |
| <b>7</b>        | 454.695   | 7.7804      | 2           | 2           | 1          |
| <b>8</b>        | 454.965   | 7.7804      | 2           | 2           | 1          |
| <b>9</b>        | 528.73    | 7.8911      | 5           | 2           | 2          |
| <b>10</b>       | 528.73    | 7.8911      | 5           | 2           | 2          |
| <b>11</b>       | 586.766   | 8.1161      | 7           | 1           | 2          |
| <b>12</b>       | 484.721   | 7.7545      | 3           | 2           | 1          |
| <b>13</b>       | 486.737   | 6.7144      | 3           | 2           | 1          |
| <b>14</b>       | 500.764   | 7.3685      | 3           | 1           | 1          |
| <b>15</b>       | 500.72    | 6.241       | 4           | 2           | 1          |
| <b>16</b>       | 500.72    | 6.241       | 4           | 2           | 1          |

<sup>a</sup>MW-molecular weight [Da]; logP-octanol/water partition coefficient; nHBA-number of hydrogen bond acceptors; nHBD-number of hydrogen bond donors; RO5-number of violations of Lipinski's rule of five: molecular weight  $\leq$  500 Da; logP  $\leq$  5; nHBA  $\leq$  10; nHBD  $\leq$  5. A maximum of 1 violation is permitted.<sup>3,4</sup>



**Table S10** Result of absorption properties of ursolic acid, corosolic acid and their derivatives by pkCSM

| Compound       | Absorption                                     |                             |                          |                           |                             |                              |
|----------------|------------------------------------------------|-----------------------------|--------------------------|---------------------------|-----------------------------|------------------------------|
|                | Caco-2 permeability                            | Human intestinal absorption | Skin permeability        | P-glyco-protein substrate | P-glyco-protein I inhibitor | P-glyco-protein II inhibitor |
| Unit           | Numeric<br>(log Papp in 10 <sup>-6</sup> cm/s) | Numeric<br>(% Absorbed)     | Numeric<br>(log Kp)      | Categorical<br>(Yes/No)   | Categorical<br>(Yes/No)     | Categorical<br>(Yes/No)      |
| Interpretation | High: > 0.90                                   | Poor absorbed: < 30%        | Low permeability: > -2.5 | Yes/No                    | Yes/No                      | Yes/No                       |
| <b>1</b>       | 1.286                                          | 100                         | -2.732                   | No                        | No                          | No                           |
| <b>2</b>       | -2.732                                         | 100                         | -2.732                   | No                        | No                          | No                           |
| <b>3</b>       | 0.74                                           | 100                         | -2.734                   | No                        | No                          | Yes                          |
| <b>4</b>       | 0.733                                          | 100                         | -2.733                   | No                        | No                          | No                           |
| <b>5</b>       | 1.223                                          | 100                         | -2.725                   | No                        | No                          | No                           |
| <b>6</b>       | 0.9                                            | 100                         | -2.735                   | Yes                       | No                          | No                           |
| <b>7</b>       | 1.318                                          | 100                         | -2.73                    | No                        | No                          | No                           |
| <b>8</b>       | 1.282                                          | 100                         | -2.732                   | No                        | No                          | Yes                          |
| <b>9</b>       | 0.747                                          | 81.549                      | -2.735                   | No                        | No                          | Yes                          |
| <b>10</b>      | 0.729                                          | 81.578                      | -2.735                   | No                        | No                          | Yes                          |
| <b>11</b>      | 0.721                                          | 86.545                      | -2.735                   | No                        | No                          | Yes                          |
| <b>12</b>      | 0.705                                          | 100                         | -2.735                   | No                        | No                          | Yes                          |
| <b>13</b>      | 0.72                                           | 100                         | -2.733                   | No                        | No                          | No                           |
| <b>14</b>      | 1.308                                          | 100                         | -2.733                   | No                        | No                          | No                           |
| <b>15</b>      | 0.84                                           | 100                         | -2.735                   | No                        | No                          | Yes                          |
| <b>16</b>      | 0.753                                          | 100                         | -2.733                   | No                        | No                          | Yes                          |

**Table S11** Result of distribution and metabolism properties of ursolic acid, corosolic acid and their derivatives by pkCSM

| Compound        | Distribution               |                          | Metabolism             |                        |                        |                        |                        |                        |                        |
|-----------------|----------------------------|--------------------------|------------------------|------------------------|------------------------|------------------------|------------------------|------------------------|------------------------|
|                 | BBB permeability           | CNS permeability         | CYP2D6 substrate       | CYP3A4 substrate       | CYP1A2 inhibitor       | CYP2C19 inhibitor      | CYP2C9 inhibitor       | CYP2D6 inhibitor       | CYP3A4 inhibitor       |
| Unit            | Numeric (logBB)            | Numeric (log PS)         | Cate- gorical (Yes/No) |
| Inter-pretation | Low: < -1;<br>High: > 0.30 | Low: < -3;<br>High: > -2 | Yes/No                 |
| <b>1</b>        | -0.182                     | -1.118                   | No                     | Yes                    | No                     | No                     | No                     | No                     | No                     |
| <b>2</b>        | -0.19                      | -2.267                   | No                     | Yes                    | No                     | No                     | No                     | No                     | No                     |
| <b>3</b>        | -0.24                      | -1.053                   | No                     | Yes                    | No                     | No                     | No                     | No                     | No                     |
| <b>4</b>        | -0.258                     | -1.274                   | No                     | Yes                    | No                     | No                     | No                     | No                     | No                     |
| <b>5</b>        | 0.073                      | -2.076                   | No                     | Yes                    | No                     | No                     | No                     | No                     | No                     |
| <b>6</b>        | -0.592                     | -1.434                   | No                     | Yes                    | No                     | No                     | No                     | No                     | No                     |
| <b>7</b>        | -0.147                     | -0.973                   | No                     | Yes                    | No                     | No                     | No                     | No                     | No                     |
| <b>8</b>        | -0.176                     | -0.974                   | No                     | Yes                    | No                     | No                     | No                     | No                     | No                     |
| <b>9</b>        | 0.136                      | -1.841                   | No                     | Yes                    | No                     | No                     | No                     | No                     | No                     |
| <b>10</b>       | 0.102                      | -1.793                   | No                     | Yes                    | No                     | No                     | No                     | No                     | No                     |
| <b>11</b>       | -0.909                     | -1.785                   | No                     | Yes                    | No                     | No                     | No                     | No                     | No                     |
| <b>12</b>       | -0.257                     | -1.012                   | No                     | Yes                    | No                     | No                     | No                     | No                     | No                     |
| <b>13</b>       | -0.262                     | -1.359                   | No                     | Yes                    | No                     | No                     | No                     | No                     | No                     |
| <b>14</b>       | -0.163                     | -1.26                    | No                     | Yes                    | No                     | No                     | No                     | No                     | No                     |
| <b>15</b>       | 0.301                      | -1.45                    | No                     | Yes                    | No                     | No                     | No                     | No                     | No                     |
| <b>16</b>       | -0.185                     | -1.564                   | No                     | Yes                    | No                     | No                     | No                     | No                     | No                     |

**Table S12** Result of excretion and toxicity properties of ursolic acid, corosolic acid and their derivatives by pkCSM

| Compound       | Excretion                  |                         | Toxicity                |                          |                         |                         |
|----------------|----------------------------|-------------------------|-------------------------|--------------------------|-------------------------|-------------------------|
|                | Total clearance            | Renal OCT2 Substrate    | AMES toxicity           | hERG I and II inhibitors | Hepatotoxicity          | Skin Sensitisation      |
| Unit           | Numeric<br>(log ml/min/kg) | Categorical<br>(Yes/No) | Categorical<br>(Yes/No) | Categorical<br>(Yes/No)  | Categorical<br>(Yes/No) | Categorical<br>(Yes/No) |
| Interpretation | Log ml/min/kg              | Yes/No                  | Yes/No                  | Yes/No                   | Yes/No                  | Yes/No                  |
| <b>1</b>       | 0.083                      | No                      | No                      | No                       | Yes                     | No                      |
| <b>2</b>       | 0.11                       | No                      | No                      | No                       | No                      | No                      |
| <b>3</b>       | -0.104                     | No                      | No                      | No                       | No                      | No                      |
| <b>4</b>       | 0.084                      | No                      | No                      | No                       | No                      | No                      |
| <b>5</b>       | 0.041                      | No                      | No                      | No                       | No                      | No                      |
| <b>6</b>       | 0.093                      | No                      | No                      | No                       | No                      | No                      |
| <b>7</b>       | -0.067                     | No                      | No                      | No                       | No                      | No                      |
| <b>8</b>       | -0.02                      | No                      | No                      | No                       | Yes                     | No                      |
| <b>9</b>       | -0.264                     | No                      | No                      | No                       | Yes                     | No                      |
| <b>10</b>      | -0.248                     | No                      | No                      | No                       | Yes                     | No                      |
| <b>11</b>      | -0.414                     | No                      | No                      | No                       | No                      | No                      |
| <b>12</b>      | -0.035                     | No                      | No                      | No                       | No                      | No                      |
| <b>13</b>      | 0.123                      | No                      | No                      | No                       | Yes                     | No                      |
| <b>14</b>      | 0.147                      | No                      | No                      | No                       | No                      | No                      |
| <b>15</b>      | 0.092                      | No                      | No                      | No                       | No                      | No                      |
| <b>16</b>      | 0.094                      | No                      | No                      | No                       | No                      | No                      |

**Table S13** Molecular docking results of ursolic acid, corosolic acid and their derivatives with COX-2 enzyme (PDB: 5FDQ)

| Compound | Binding affinity (kcal/mol) | Hydrophobic interactions                                                                                                                   | Hydrogen Bond interactions               | Unfavourable interactions |
|----------|-----------------------------|--------------------------------------------------------------------------------------------------------------------------------------------|------------------------------------------|---------------------------|
| 1        | -7.2                        | HIS (A: 207), HIS (A: 386), HIS (A: 388), ALA (A: 446), VAL (A: 447), ALA (A: 450)                                                         |                                          |                           |
| 2        | -6.7                        | HIS (A: 207), HIS (A: 214), ILE (A: 274), VAL (A: 291), LEU (A: 294), HIS (A: 386)                                                         | THR (A: 212), ASN (A: 382), GLN (A: 454) |                           |
| 3        | -7                          | HIS (A: 207), HIS (A: 214), ILE (A: 274), VAL (A: 291), LEU (A: 294), MET (A: 458)                                                         | ASN (A: 382), HIS (A: 386)               |                           |
| 4        | -7.3                        | HIS (A: 207), HIS (A: 214), ILE (A: 274), VAL (A: 291), LEU (A: 294), HIS (A: 386)                                                         | ASN (A: 382), GLN (A: 454)               |                           |
| 5        | -6.7                        | HIS (A: 207), LEU (A: 294), HIS (A: 386), VAL (A: 444), VAL (A: 447)                                                                       |                                          | HIS (A: 214)              |
| 6        | -7                          | HIS (A: 207), ILE (A: 274), VAL (A: 291), LEU (A: 294)                                                                                     | ASN (A: 382)                             |                           |
| 7        | -6.7                        | HIS (A: 214), VAL (A: 291), LEU (A: 294), LEU (A: 408), VAL (A: 444), VAL (A: 447)                                                         | HIS (A: 207), PHE (A: 210)               |                           |
| 8        | -6.8                        | HIS (A: 207), HIS (A: 214), ILE (A: 274), VAL (A: 291), LEU (A: 294), HIS (A: 386)                                                         | ASN (A: 382)                             |                           |
| 9        | -6.8                        | HIS (A: 214), VAL (A: 291), LEU (A: 294), VAL (A: 295), LEU (A: 391), PHE (A: 395), PHE (A: 407), LEU (A: 408), VAL (A: 444), VAL (A: 447) | PHE (A: 210)                             |                           |
| 10       | -6.5                        | HIS (A: 214), VAL (A: 291), LEU (A: 294), LEU (A: 408), VAL (A: 444), VAL (A: 447)                                                         | HIS (A: 207)                             |                           |
| 11       | -6.8                        | HIS (A: 207), PHE (A: 210), VAL (A: 447)                                                                                                   | THR (A: 206), TYR (A: 385), HIS (A: 386) |                           |
| 12       | -6.7                        | HIS (A: 214), VAL (A: 291), LEU (A: 294), LEU (A: 408), VAL (A: 444), VAL (A: 447)                                                         | HIS (A: 207)                             |                           |
| 13       | -6.6                        | VAL (A: 444), VAL (A: 447)                                                                                                                 | HIS (A: 386)                             |                           |
| 14       | -6.4                        | HIS (A: 214), VAL (A: 291), LEU (A: 294), LEU (A: 408), VAL (A: 447)                                                                       | GLN (A: 203), HIS (A: 207)               |                           |
| 15       | -6.9                        | HIS (A: 214), VAL (A: 291), LEU (A: 294), LEU (A: 408)                                                                                     | GLN (A: 203), HIS (A: 207), PHE (A: 210) |                           |
| 16       | -6.9                        | HIS (A: 214), HIS (A: 386), VAL (A: 444), VAL (A: 447)                                                                                     | HIS (A: 207), ASN (A: 382)               |                           |

**Table S14** Molecular docking results of ursolic acid, corosolic acid and their derivatives with the EGFR kinase domain (non-small lung cancer, PDB: 2GS2)

| Compound | Binding affinity (kcal/mol) | Hydrophobic interactions                                                                         | Hydrogen Bond interactions               | Unfavourable interactions |
|----------|-----------------------------|--------------------------------------------------------------------------------------------------|------------------------------------------|---------------------------|
| 1        | -7.6                        | LEU (A: 694), VAL (A: 702), ALA (A: 719), LYS (A: 721), LEU (A: 820)                             | GLY (A: 772), CYS (A: 773)               |                           |
| 2        | -7.4                        | LEU (A: 694), VAL (A: 702), ALA (A: 719), LYS (A: 721)                                           | ASP (A: 776)                             |                           |
| 3        | -7                          | LEU (A: 694), VAL (A: 702), ALA (A: 719), LYS (A: 721)                                           | ASP (A: 776)                             |                           |
| 4        | -7.2                        | LEU (A: 694), VAL (A: 702), ALA (A: 719), LYS (A: 721)                                           |                                          |                           |
| 5        | -7.6                        | LEU (A: 694), VAL (A: 702), ALA (A: 719), LYS (A: 721), LEU (A: 820)                             | THR (A: 830)                             |                           |
| 6        | -7.9                        | VAL (A: 702), ALA (A: 719), LYS (A: 721)                                                         | ASP (A: 776), THR (A: 830)               |                           |
| 7        | -7.8                        | LEU (A: 694), VAL (A: 702), ALA (A: 719), LYS (A: 721)                                           | THR (A: 830)                             |                           |
| 8        | -7.6                        | VAL (A: 702), ALA (A: 719), MET (A: 742), CYS (A: 751), CYS (A: 773), LEU (A: 820)               | THR (A: 830)                             | ASP (A: 831)              |
| 9        | -6.8                        | ALA (A: 698), VAL (A: 702), ALA (A: 719), LYS (A: 721), CYS (A: 751), LEU (A: 820)               | GLY (A: 695), THR (A: 766), THR (A: 830) | SER (A: 696)              |
| 10       | -8                          | LEU (A: 694), ALA (A: 698), VAL (A: 702), ALA (A: 719), LEU (A: 768), MET (A: 769), LEU (A: 820) |                                          |                           |
| 11       | -6.5                        | VAL (A: 702), ALA (A: 719), LYS (A: 721), ARG (A: 817), LEU (A: 820)                             | CYS (A: 773), ARG (A: 817), THR (A: 830) |                           |
| 12       | -7.4                        | VAL (A: 702), ALA (A: 719), LYS (A: 721)                                                         | ASP (A: 776), THR (A: 830)               |                           |
| 13       | -7.4                        | VAL (A: 702), ALA (A: 719), LYS (A: 721), LEU (A: 820)                                           | ASP (A: 776), THR (A: 830)               |                           |
| 14       | -7.2                        | VAL (A: 702), ALA (A: 719), LYS (A: 721), LEU (A: 820)                                           | ASP (A: 776), THR (A: 830)               |                           |
| 15       | -7.4                        | VAL (A: 702), ALA (A: 719), LYS (A: 721)                                                         | ASP (A: 776), THR (A: 830)               |                           |
| 16       | -7.6                        | ARG (A: 817), LEU (A: 820)                                                                       | THR (A: 766), THR (A: 830)               | MET (A: 769)              |

**Table S15** Molecular docking results of ursolic acid, corosolic acid and their derivatives with chimaeric Bcl2-xL (breast cancer MCF-7, PDB: 2W3L)

| Compound | Binding affinity (kcal/mol) | Hydrophobic interactions                                                      | Hydrogen Bond interactions               | Unfavourable interactions  |
|----------|-----------------------------|-------------------------------------------------------------------------------|------------------------------------------|----------------------------|
| 1        | -6.7                        | PHE (A: 63), TYR (A: 67), PHE (A: 71), MET (A: 74), ALA (A: 108)              | LEU (A: 96)                              |                            |
| 2        | -7                          | PHE (A: 63), TYR (A: 67), PHE (A: 71), ALA (A: 108)                           | ARG (A: 105)                             |                            |
| 3        | -6.7                        | TYR (A: 67)                                                                   | GLU (A: 73)                              |                            |
| 4        | -7.1                        | PHE (A: 63), TYR (A: 67), PHE (A: 71), ALA (A: 108)                           | ARG (A: 105)                             |                            |
| 5        | -7.1                        | PHE (A: 63), TYR (A: 67), PHE (A: 71), MET (A: 74), ALA (A: 108)              | ARG (A: 105)                             |                            |
| 6        | -7.3                        | PHE (A: 63), TYR (A: 67), PHE (A: 71), MET (A: 74), ALA (A: 108)              | ARG (A: 105)                             |                            |
| 7        | -7.1                        | PHE (A: 63), TYR (A: 67), PHE (A: 71), MET (A: 74)                            | ARG (A: 105), ALA (A: 108)               |                            |
| 8        | -7.2                        | PHE (A: 63), TYR (A: 67), PHE (A: 71), MET (A: 74), LEU (A: 96), ALA (A: 108) | ARG (A: 105)                             |                            |
| 9        | -6.7                        | TYR (A: 67), PHE (A: 71), MET (A: 74)                                         | TYR (A: 67)                              |                            |
| 10       | -7.1                        | VAL (A: 92), LEU (A: 96), ARG (A: 105)                                        |                                          |                            |
| 11       | -6.5                        | PHE (A: 63), TYR (A: 67), PHE (A: 71), ALA (A: 108)                           | ARG (A: 105), ALA (A: 108)               | ASN (A: 102), ARG (A: 105) |
| 12       | -7                          | PHE (A: 63), TYR (A: 67), PHE (A: 71)                                         | ARG (A: 105), ALA (A: 108)               | ARG (A: 105)               |
| 13       | -7.1                        | PHE (A: 63), TYR (A: 67), PHE (A: 71)                                         | ARG (A: 105)                             |                            |
| 14       | -7                          | PHE (A: 63), TYR (A: 67), PHE (A: 71)                                         | ASN (A: 102), ARG (A: 105), ALA (A: 108) |                            |
| 15       | -7.2                        | PHE (A: 63), TYR (A: 67), PHE (A: 71)                                         | ARG (A: 105)                             | ASN (A: 102), ARG (A: 105) |
| 16       | -7.1                        | PHE (A: 63), TYR (A: 67), PHE (A: 71)                                         | ARG (A: 105)                             |                            |

**Table S16** Molecular docking results of ursolic acid, corosolic acid and their derivatives with kappaB kinase beta (PDB: 3RZF)

| Compound | Binding affinity (kcal/mol) | Hydrophobic interactions                                                                                   | Hydrogen Bond interactions | Unfavourable interactions |
|----------|-----------------------------|------------------------------------------------------------------------------------------------------------|----------------------------|---------------------------|
| 1        | -6.9                        | VAL (A: 29), ALA (A: 42), MET (A: 96), ILE (A: 165)                                                        | THR (A: 23), ASP (A: 103)  |                           |
| 2        | -6.8                        | LEU (A: 21), VAL (A: 29), ALA (A: 42), TYR (A: 98), ILE (A: 165)                                           | ASP (A: 103)               |                           |
| 3        | -6.3                        | LEU (A: 21), VAL (A: 29), ALA (A: 42), TYR (A: 98), LYS (A: 106), VAL (A: 152), ILE (A: 165)               | GLU (A: 149)               |                           |
| 4        | -6                          | LEU (A: 21), VAL (A: 29), ALA (A: 42), TYR (A: 98), VAL (A: 152)                                           | GLU (A: 100), GLU (A: 149) |                           |
| 5        | -7.1                        | LEU (A: 21), VAL (A: 29), ALA (A: 42), TYR (A: 98), LYS (A: 106), ILE (A: 165)                             | GLU (A: 149)               |                           |
| 6        | -7.1                        | LEU (A: 21), VAL (A: 29), ALA (A: 42), TYR (A: 98), LYS (A: 106), VAL (A: 152), ILE (A: 165)               |                            | ASP (A: 103)              |
| 7        | -7.1                        | LEU (A: 21), VAL (A: 29), ALA (A: 42), TYR (A: 98), LYS (A: 106), VAL (A: 152), ILE (A: 165)               |                            | ASP (A: 103)              |
| 8        | -7                          | LEU (A: 21), VAL (A: 29), ALA (A: 42), TYR (A: 98), LYS (A: 106), ILE (A: 165)                             | ASP (A: 103)               |                           |
| 9        | -6.3                        | LEU (A: 21), VAL (A: 29), ALA (A: 42), TYR (A: 98), LYS (A: 106), VAL (A: 152), ILE (A: 165)               |                            | ASP (A: 103)              |
| 10       | -7.6                        | LEU (A: 21), VAL (A: 29), ALA (A: 42), ILE (A: 165)                                                        | GLU (A: 100), ASP (A: 103) |                           |
| 11       | -6.3                        | LEU (A: 21), VAL (A: 29), ALA (A: 42), TYR (A: 98), ARG (A: 105), LYS (A: 106), VAL (A: 152), ILE (A: 165) |                            | ASP (A: 103)              |
| 12       | -6.7                        | LEU (A: 21), VAL (A: 29), ALA (A: 42), TYR (A: 98), VAL (A: 152), ILE (A: 165)                             | GLU (A: 149)               |                           |
| 13       | -6.9                        | LEU (A: 21), VAL (A: 29), ALA (A: 42), TYR (A: 98), ILE (A: 165)                                           | ASP (A: 103)               |                           |
| 14       | -6.7                        | LEU (A: 21), VAL (A: 29), ALA (A: 42), TYR (A: 98), LYS (A: 106), VAL (A: 152), ILE (A: 165)               | GLU (A: 149)               |                           |
| 15       | -6.7                        | LEU (A: 21), VAL (A: 29), ALA (A: 42), TYR (A: 98), LYS (A: 106), VAL (A: 152), ILE (A: 165)               |                            | ASP (A: 103)              |
| 16       | -6.9                        | LEU (A: 21), VAL (A: 29), ALA (A: 42), TYR (A: 98), LYS (A: 106), ILE (A: 165)                             |                            |                           |

## References

1. A. V. Tkachev, A. Yu. Denisov, Y. V. Gatilov, I. Yu. Bagryanskaya, S. A. Shevtsov and T. V. Rybalova, *Tetrahedron*, 1994, **50**, 11459–11488.
2. T. H. Kwon, B. Lee, S. H. Chung, D. H. Kim and Y. S. Lee, *Bull. Korean Chem. Soc.*, 2009, **30**, 119–123.
3. C. A. Lipinski, *Drug Discov. Today Technol.*, 1997, **23**, 3-25.
4. C. A. Lipinski, *Drug Discov. Today Technol.*, 2004, **1**, 337-341.
